# Supplementary material for: Factors influencing healthcare-seeking behaviour among Muslims from Southeast Asian countries (Indonesia and Malaysia) living in Japan: an exploratory qualitative study
Source: HighWire-hosted journal article supplement (doi:10.1136/bmjopen-2021-058718), 2022-10-01
Supplement: bmjopen-2021-058718supp002_data_supplement.pdf [file bmjopen-2021-058718supp002_data_supplement.pdf]

## Supplementary Document 2: Themes, Sub-themes, and Codes

| Themes                                             | Sub-themes                                       | Codes                                               |
|----------------------------------------------------|--------------------------------------------------|-----------------------------------------------------|
| Trying to comply with the recommendation of Islam  | Keeping the Aurat                                | Request for a Female Doctor                         |
|                                                    |                                                  | Call Beforehand to Ask for Female Doctor            |
|                                                    |                                                  | Keeping the Aurat                                   |
|                                                    | Permissible to Receive Healthcare                | Exigency (Darurat)                                  |
|                                                    |                                                  | Health Benefit Priority than Halalness of Medicine  |
|                                                    |                                                  | Permissible to Survive                              |
|                                                    |                                                  | Given No Choice                                     |
|                                                    | Preference for Halal Food                        | Preference for halal food                           |
|                                                    | Struggle to Obtain Halal Medicine                | Look for Halal Medicine                             |
|                                                    |                                                  | Uncertain about What is Halal Medicine              |
| Use of Alcohol in Medical Treatment is Permissible |                                                  |                                                     |
| Need for Prayer Space inside the Hospital          | Need for Prayer Space Inside the Hospital        |                                                     |
| Confusion on Healthcare System                     | Accustomed to the Medical System in Home Country | Different Medical System Compared with Home Country |
|                                                    |                                                  | Buy Medicine Home and Bring to Japan                |
|                                                    |                                                  | Not Satisfied by the Opening Hours of Clinics       |
|                                                    | Evaluate the Situation before Making Requests    | Evaluate the Situation before Making Requests       |
| Not Knowing How to Access Emergency Care           |                                                  | Experience of Calling for an Ambulance              |
|                                                    |                                                  | Visiting ER by Their Own Without using Ambulance    |

|                                                  |                                             |                                                           |
|--------------------------------------------------|---------------------------------------------|-----------------------------------------------------------|
|                                                  |                                             | Panic Situation                                           |
| Make do with Information and Support among Peers | Relying on Information from Muslim Friends  | Valuing Information from Muslim Friends                   |
|                                                  |                                             | Asking Friends for Hospital Information                   |
|                                                  | Helping Each Other among Muslim Friends     | Accompanying Friends to the Hospital                      |
|                                                  |                                             | Being Accompanied by Muslim Friends to Visit Hospital     |
| Language Barrier Problems                        | Prefer English Communication for Healthcare | Prefer English-speaking doctors and nurses                |
|                                                  |                                             | Information in English at clinics and hospitals           |
|                                                  | Encounter Problems due to Language Barrier  | Language problem                                          |
|                                                  |                                             | Encountered difficulties during registration              |
|                                                  |                                             | Miscommunication with the doctors due to language barrier |
|                                                  | Depend on Translation                       | Supported by medical translator                           |
|                                                  |                                             | Conversation using machine translation                    |
